# Supplementary material for: Differential Contribution of the Parental Genomes to a S. cerevisiae × S. uvarum Hybrid, Inferred by Phenomic, Genomic, and Transcriptomic Analyses, at Different Industrial Stress Conditions
Source: PubMed Central journal article supplement (PMC7062649; doi:10.3389/fbioe.2020.00129), 2020-03-03
Supplement: Table_1.pdf [file Table_1.pdf]

**Table S1 PCR-RFLP analysis of 10 colonies isolates from the different hybrids obtained by sporulation**

|               | <i>APM3</i> (II) | ITS (XII) | <i>UGA3</i> (IV) | <i>GSY1</i> (VI) | <i>BRE5</i> (XIV) |
|---------------|------------------|-----------|------------------|------------------|-------------------|
| H3 D1         | U                | U         | U                | U                | U                 |
| H3 D2         | U                | U         | U                | U                | U                 |
| H3 D3         | U                | U         | U                | U                | U                 |
| H3 D4         | U                | U         | U                | U                | U                 |
| H3 F2         | U                | U         | U                | U                | U                 |
| H3 F3         | U                | U         | U                | U                | U                 |
| H3 G6         | U                | U         | U                | U                | U                 |
| H3 G7         | U                | U         | U                | U                | U                 |
| H3 G8         | U                | U         | U                | U                | U                 |
| H3 G9         | U                | U         | U                | U                | U                 |
| H4 A6         | U                | U         | U                | U                | U                 |
| H4 A7         | U                | U         | U                | U                | U                 |
| H4 A8         | U                | U         | U                | U                | U                 |
| H4 A9         | U                | U         | U                | U                | U                 |
| H4 I2         | U                | U         | U                | U                | U                 |
| H4 I3         | U                | U         | U                | U                | U                 |
| H4 I4         | U                | U         | U                | U                | U                 |
| H4 I6         | U                | U         | U                | U                | U                 |
| H4 I7         | U                | U         | U                | U                | U                 |
| H4 I8         | U                | U         | U                | U                | U                 |
| <b>H14 A6</b> | <b>CU</b>        | <b>CU</b> |                  |                  |                   |
| <b>H14 A7</b> | <b>CU</b>        | <b>CU</b> |                  |                  |                   |
| <b>H14 A8</b> | <b>C</b>         | <b>C</b>  | <b>C</b>         | <b>CU</b>        |                   |
| <b>H14 A9</b> | <b>C</b>         | <b>CU</b> |                  |                  |                   |
| <b>H14 B1</b> | <b>C</b>         | <b>C</b>  | <b>C</b>         | <b>CU</b>        |                   |
| <b>H14 C1</b> | <b>C</b>         | <b>CU</b> |                  |                  |                   |
| H14 D6        | C                | C         | C                | C                | C                 |
| <b>H14 D7</b> | <b>C</b>         | <b>C</b>  | <b>C</b>         | <b>CU</b>        |                   |
| <b>H14 D8</b> | <b>CU</b>        | <b>CU</b> |                  |                  |                   |

Note: The isolates that remained being hybrids are marked in bold. U means that at this genomic region both alleles show *S. uvarum* pattern, C *S. cerevisiae* pattern and CU both species patterns.
