# Supplementary material for: Differential Contribution of the Parental Genomes to a S. cerevisiae × S. uvarum Hybrid, Inferred by Phenomic, Genomic, and Transcriptomic Analyses, at Different Industrial Stress Conditions
Source: PubMed Central journal article supplement (PMC7062649; doi:10.3389/fbioe.2020.00129), 2020-03-03
Supplement: Table_2.pdf [file Table_2.pdf]

**Supplementary Table S2. Total number of SNPs in AJ4, BMV58 and H14A7 strains**

| <b>Strain</b> | <b>SNP type</b>      | <b>Number</b>   | <b>SNP/kb</b>   | <b>SNPs %</b> |
|---------------|----------------------|-----------------|-----------------|---------------|
| AJ4           | intergenic           | 4495            |                 |               |
| AJ4           | synonymous           | 1905            |                 |               |
| AJ4           | nonsynonymous        | 1952            |                 |               |
| AJ4           | total                | 8352            |                 |               |
| <b>AJ4</b>    | <b>SNP frequency</b> | <b>0,000673</b> | <b>0,673227</b> | <b>0,067%</b> |
| BMV58         | intergenic           | 1894            |                 |               |
| BMV58         | synonymous           | 398             |                 |               |
| BMV58         | nonsynonymous        | 312             |                 |               |
| BMV58         | total                | 2604            |                 |               |
| <b>BMV58</b>  | <b>SNP frequency</b> | <b>0,000223</b> | <b>0,223386</b> | <b>0,022%</b> |
| H14A7         | intergenic           | 7206            |                 |               |
| H14A7         | synonymous           | 2716            |                 |               |
| H14A7         | nonsynonymous        | 2274            |                 |               |
| H14A7         | total                | 12196           |                 |               |
| <b>H14A7</b>  | <b>SNP frequency</b> | <b>0,000507</b> | <b>0,506839</b> | <b>0,051%</b> |
